# Supplementary material for: A rationally designed molecule for removal of cyanide from human blood serum and cytochrome c oxidase
Source: Royal Society of Chemistry journal article supplement (doi:10.1039/c4ra09658d), 2014-11-05
Supplement: c4ra09658d1.pdf [file c4ra09658d1.pdf]

**Supporting Information**  
**for**  
**Rationally Designed Molecule for Removal of Cyanide from**  
**Human Blood Serum and Cytochrome c Oxidase**

Sukhmeet Kaur, Amrinder Singh, Venus Singh Mithu and Palwinder Singh\*  
Centre for Advanced Studies, Department of Chemistry, Guru Nanak Dev University,  
Amritsar-143005. India

**Table of contents**

| S. No. | content                                                                                                                                                      | Page No. |
|--------|--------------------------------------------------------------------------------------------------------------------------------------------------------------|----------|
| 1.     | Materials and Methods                                                                                                                                        | 2-4      |
| 2.     | UV-vis spectra showing selective and competitive interactions of compound <b>2</b> with CN <sup>-</sup> (Figure S1-S3)                                       | 5        |
| 3.     | <sup>1</sup> H NMR spectrum of compound <b>2</b> (black trace) in presence of CN <sup>-</sup> (Figure S4)                                                    | 6        |
| 4.     | Spectral data of compound <b>2</b> (Figure S5-S9)                                                                                                            | 7 – 9    |
| 5.     | <sup>1</sup> H NMR and HPLC chromatogram of compound <b>4</b> (Figure S10)                                                                                   | 9 – 10   |
| 6.     | NMR spectra of compound <b>6</b> (Figure S11-S13)                                                                                                            | 11-12    |
| 7.     | Spectral data of compound <b>3</b> (Figure 14)                                                                                                               | 12-21    |
| 8.     | Table S1: Composition of tap water and ultrapure water used in the present studies                                                                           | 22       |
| 9.     | Table S2. Addition of various salts to solution of compound <b>3</b> in ultrapure water.                                                                     | 22       |
| 10.    | Colour change of compound <b>3</b> in presence of anions (Figure S15)                                                                                        | 23       |
| 11.    | UV-Vis spectral change in 1 μM solution of compound <b>3</b> in CHCl <sub>3</sub> when TBACN was added (Figure S16).                                         | 23       |
| 12.    | Job's plot for compound <b>3</b> with CN <sup>-</sup> , monitored at 501 nm. (Figure S17)                                                                    | 23       |
| 13.    | Linear plot of change in absorbance at 387 nm Vs [CN <sup>-</sup> ] for determination of detection limit of CN <sup>-</sup> by compound <b>3</b> (Figure 18) | 24       |
| 14.    | D <sub>2</sub> O exchange <sup>1</sup> H NMR spectrum of compound <b>3</b> (Figure S19)                                                                      | 25       |
| 15.    | Parts of the <sup>1</sup> H NMR spectrum of compound <b>3</b> in presence of CN (Figure S20)                                                                 | 26       |
| 16.    | SEM images (Figure S21)                                                                                                                                      | 27       |
| 17.    | Mass spectrum showing breakdown of compound <b>7/8</b> to smaller components (Figure S22), Scheme S1                                                         | 28       |
| 18.    | Inhibition constant (K <sub>i</sub> ) of cyanide for Cyt c oxidase (Figure S23)                                                                              | 29       |
| 19.    | Recovery of cyanide bound CcOX activity in presence of compound <b>2</b> (Figure S24)                                                                        | 29       |

**Materials and Methods:** Assay buffer, Enzyme dilution buffer, Dithiothretol solution, Cytochrome c, Cytochrome c oxidase, Dimethyl sulphoxide, mesitylene, oxindole, AlCl<sub>3</sub>, Formaldehyde, HBr-AcOH, NaCN, TBACN

**General note:** <sup>1</sup>H and <sup>13</sup>C NMR spectra were recorded on JEOL 300 MHz, Bruker 500 MHz and 75 MHz, 125 MHz NMR spectrometer, respectively using CDCl<sub>3</sub> and DMSO-*d*<sub>6</sub> as a solvent. Chemical shifts are given in ppm with TMS as internal reference. *J* values are given in Hertz. Mass spectra were recorded on Bruker micrOTOF-Q II Mass spectrometer. Reactions were monitored by thin layer chromatography (TLC) on glass plates coated with silica gel GF-254. Column chromatography was performed with 60-120 mesh silica. IR and UV spectral data were recorded on FTIR (VARIAN 660 IR) and BIOTEK Synergy H1 Hybrid Reader instruments, respectively. HPLC was performed on Shimadhu LC-20 AD instrument. SEM images were recorded on ZEISS EVO LS10 scanning electron microscope.

#### **UV-vis spectral studies:**

Stock solutions of the compounds (10<sup>-3</sup> M) were prepared in HPLC grade DMSO. Stock solution of CN (10<sup>-3</sup> M) was prepared in distilled water. As per requirement, dilutions of the compound and cyanide solutions were made in ethanol/DMSO – water.

Equation for calculation of binding constants

Binding constants of compound-cyanide complex were calculated using Benesi-Hildebrand Equation.

$$1/(A_f - A_{obs}) = 1/(A_f - A_{fc}) + 1/K(A_f - A_{fc})[\text{Ligand}]$$

where *A<sub>f</sub>* is absorbance of free host, *A<sub>obs</sub>* is absorbance observed, *A<sub>fc</sub>* is absorbance at saturation, *K* is binding constant.

**Experiments with human blood serum.** Human blood serum was taken with thanks from the local Medical College and used as provided. 1ml of the serum was diluted in 10 ml ultrapure water. A certain amount of NaCN/CuCN was added to this solution so that the

concentration of cyanide becomes 1 nM. Presence of 200 nM compound **3** in the serum solution turned its color dark red. For extraction of the new chemical entity which was formed by the reaction of compound **3** with cyanide, higher equivalents of the cyanide and compound were used. The dark red solution was extracted with ethyl acetate. The organic layer was evaporated under vacuum to get a solid mass which after analysis was found to be compound **7**.

**Disposal of compound 7.** Solution of compound **7** in ethanol – water (1:1) pH 9.5-10 was stirred at room temperature and the changes were monitored with HRMS.

**NMR spectral studies:** <sup>1</sup>H NMR spectra of pure compounds (0.35 mM) were recorded in CDCl<sub>3</sub> at probe temperature 25 °C. Deuterium exchange (using D<sub>2</sub>O) was performed to identify the OH signals. Calculated amount of TBACN was stepwise added to the NMR tube and spectrum was recorded at each step.

**Mass spectral studies:** All the mass spectra were recorded on Bruker MicroTOF QII machine in +ve/-ve ESI mode with capillary voltage 4500 V and source temperature 180 °C. Solutions of 1 μM concentration of the compounds alone as well as in combination with CN<sup>-</sup> were prepared in ACN-H<sub>2</sub>O (3:7) and directly injected to the ion source of the spectrometer.

### **Cytochrome c oxidase assay**

All the components of the assay kit were diluted as per the assay manual.<sup>1</sup> UV-vis absorption of cytochrome c at 550 nm changes with its oxidation state. This property was the basis for the assay. Cytochrome c is reduced with dithiothreitol and then oxidized by the cytochrome c oxidase (CcOX). The decrease in absorbance of ferrocytochrome c at 550 nm is caused by its oxidation to ferricytochrome c by cytochrome c oxidase. During present studies, first the solution of sodium cyanide was stepwise added to solution of cytochrome c oxidase in enzyme buffer. After each addition of cyanide to CcOX, it was added to solution of ferrocytochrome c (0.55 μM) in assay buffer and absorbance at 550 nm was measured.

Concentration of sodium cyanide, at which it completely blocks the activity of the enzyme, so that oxidation of ferrocytochrome c does not occur, was optimized as 2.8  $\mu\text{M}$ . Next, solution of compound **3** was stepwise added to solution of cyanide bound cytochrome c oxidase. This solution was added to the solution of ferrocytochrome c in assay buffer and changes in absorbance at 550 nm were monitored. With the addition of 13  $\mu\text{M}$  of compound **3** to cyanide bound cyt c oxidase and its subsequent addition to cyt c finished the absorbance at 550 nm. At this stage, compound **3** removed the cyanide from cyt c oxidase and its oxidizing activity was restored.

1. Cytochrome c Oxidase Assay kit, Sigma Aldrich, Product Code: CYTOCOX1

Time course for the oxidation of reduced cytochrome c catalyzed by the CcOX in the presence of 2.8  $\mu\text{M}$  cyanide was measured at 550 nm and recovery of CcOX activity was calculated by using the following formula:

**Calculation of CcOX activity:**

$$\text{CcOX activity } (\mu\text{mol red. cyt. c/min}) = (\Delta A/\text{min} \times 1.1) / (\text{vol of enzyme}) \times 21.84$$

where,  $\Delta A/\text{min} = A/\text{minute}_{(\text{sample})} - A/\text{minute}_{(\text{blank})}$

1.1 = reaction volume

21.84 =  $\Delta\epsilon^{\text{mM}}$  between ferrocytochrome c and ferricytochrome c at 550 nm

**Toxicity assay.** The toxicity of the compound was checked by National Cancer Institute, Bethesda, USA as per their standard protocol ([www.dtp.nci.nih.gov](http://www.dtp.nci.nih.gov)).

**Scanning electron microscope images.** The samples were vacuum dried and precoated with gold using Quorum Q150R ES coating machine. SEM images were recorded on ZEISS EVO LS10 scanning electron microscope.

### UV-vis spectra showing selective and competitive interactions of compound 2 with $\text{CN}^-$

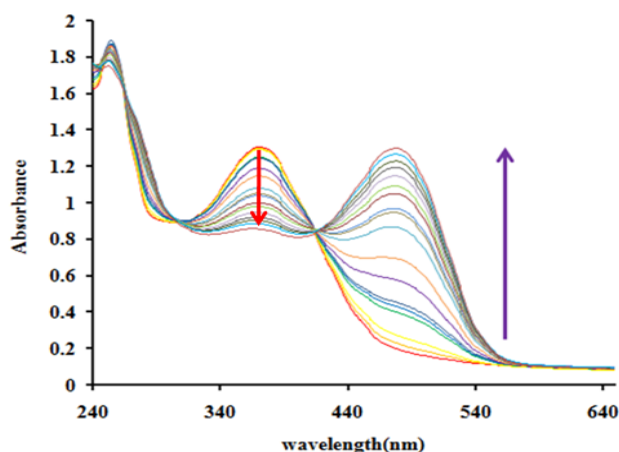

**Figure S1.** UV-vis absorption spectra of compound 2 (10  $\mu\text{M}$ , ethanol-water, 1:1 v/v) upon incremental addition of  $\text{CN}^-$  (up to 30 equiv). No change in UV-vis spectrum was observed when more of  $\text{CN}^-$  was added.

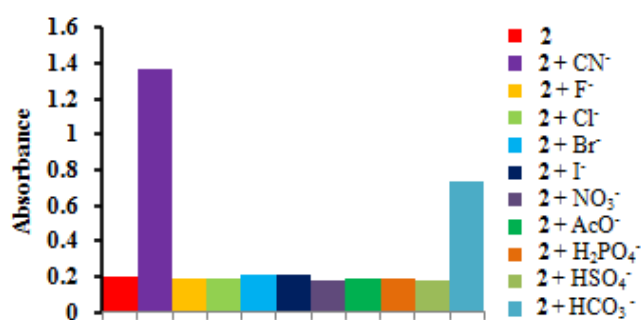

**Figure S2.** Selectivity of compound 2 for  $\text{CN}^-$ . Bar graph showing absorbance of compound 2 at 477 nm in presence of 30 equiv of various anions.

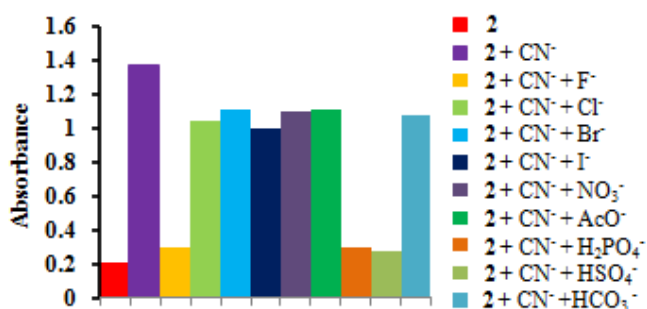

**Figure S3.** Competitive bonding of compound 2 with  $\text{CN}^-$ . Absorption intensity at 477 nm of solution of compound 2 (10  $\mu\text{M}$ ) in presence of  $\text{CN}^-$  and other anions.

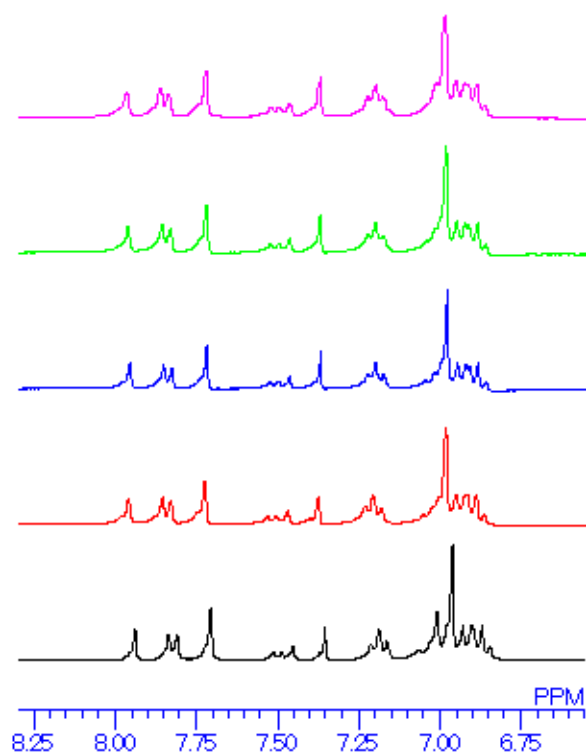

**Figure S4.** <sup>1</sup>H NMR spectrum of compound **2** (black trace) in presence of CN<sup>-</sup> showing disappearance of OH peak at  $\delta$  6.98. **2**+0.2 equiv CN<sup>-</sup> (red trace), **2**+0.4 equiv CN<sup>-</sup> (blue trace), **2**+0.6 equiv CN<sup>-</sup> (green trace), **2**+0.8 equiv CN<sup>-</sup> (pink trace).

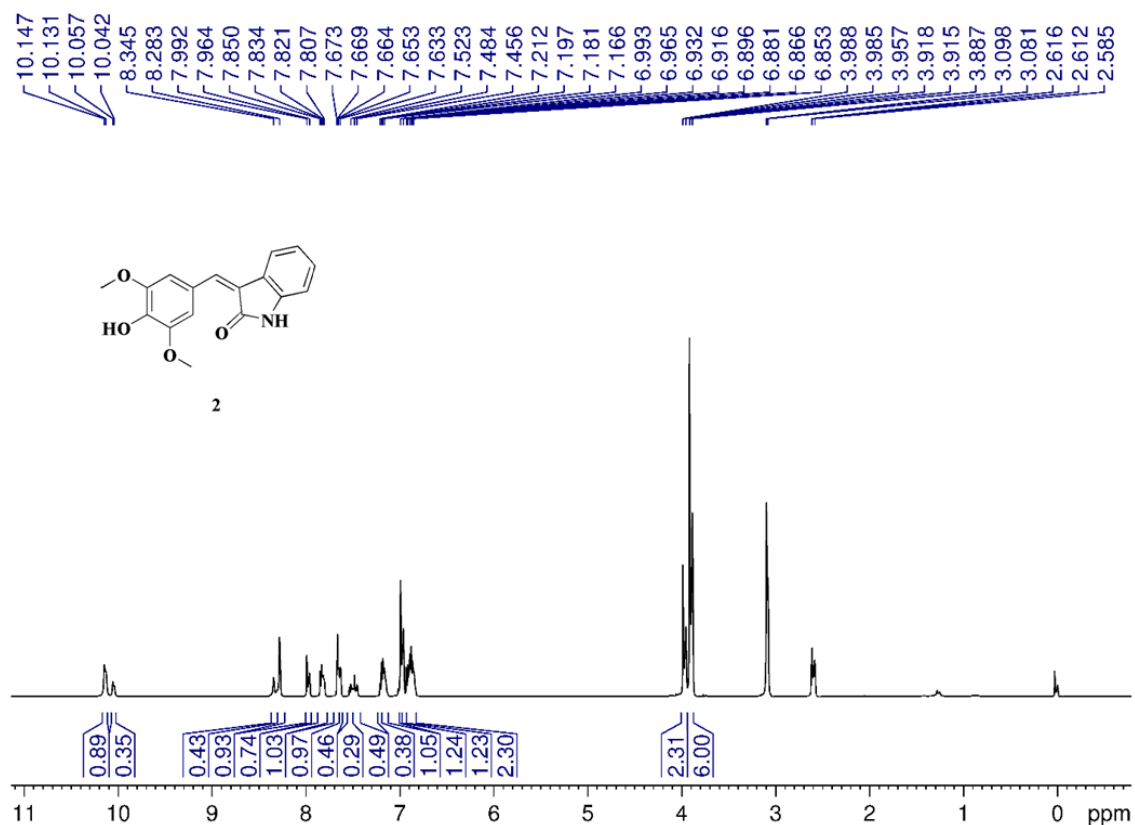

Figure S5. <sup>1</sup>H NMR spectrum of compound 2 (CDCl<sub>3</sub> + DMSO-*d*<sub>6</sub>).

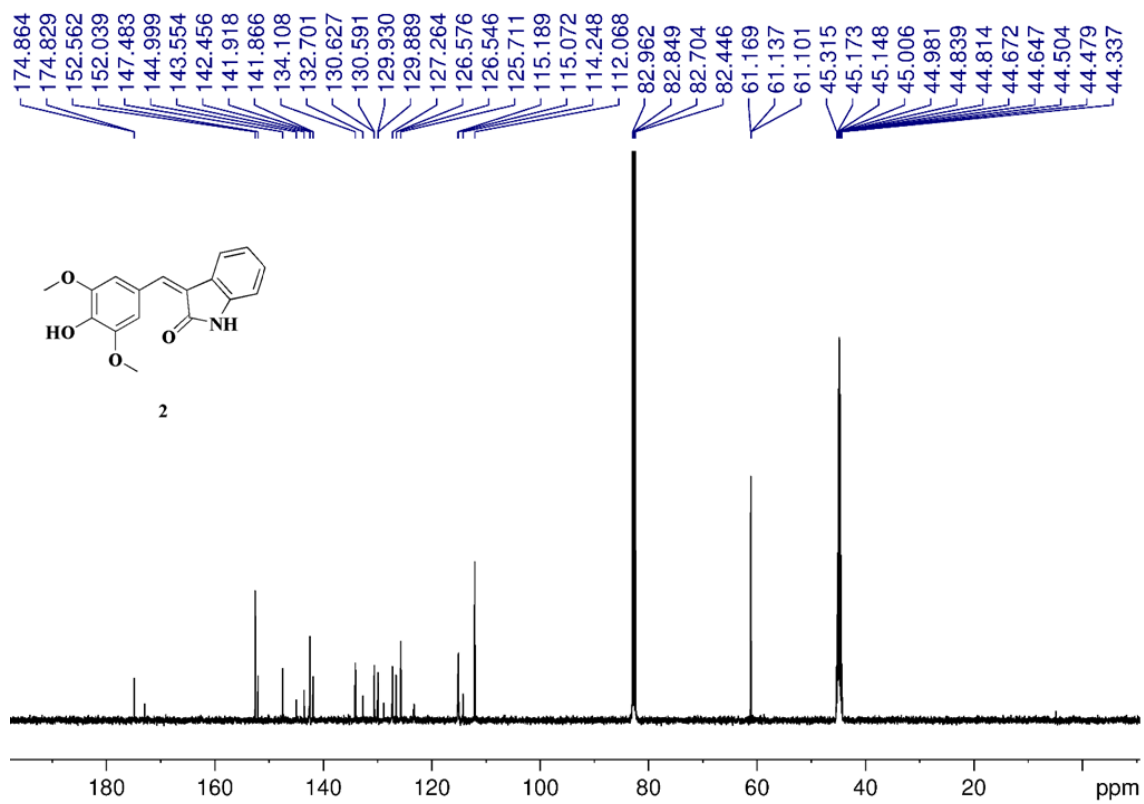

Figure S6. <sup>13</sup>C NMR spectrum of compound 2 (CDCl<sub>3</sub> + DMSO-*d*<sub>6</sub>).

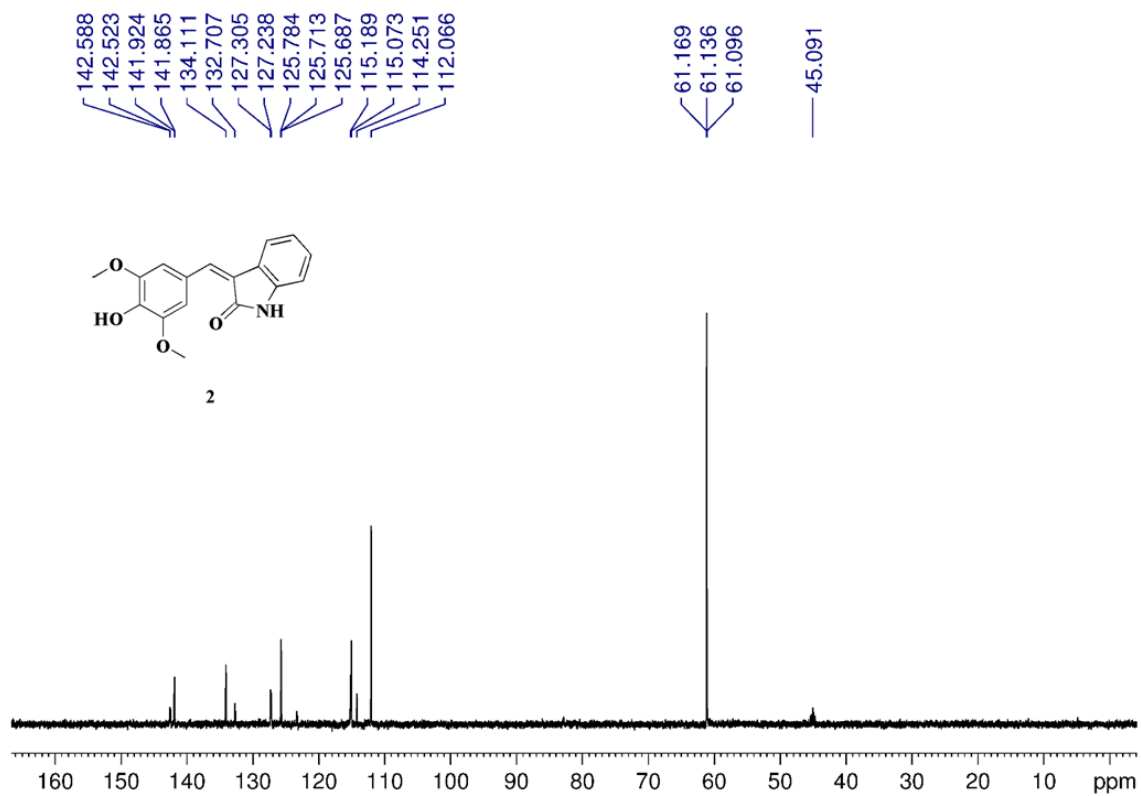

Figure S7. DEPT-135 spectrum of compound **2** ( $\text{CDCl}_3 + \text{DMSO-}d_6$ ).

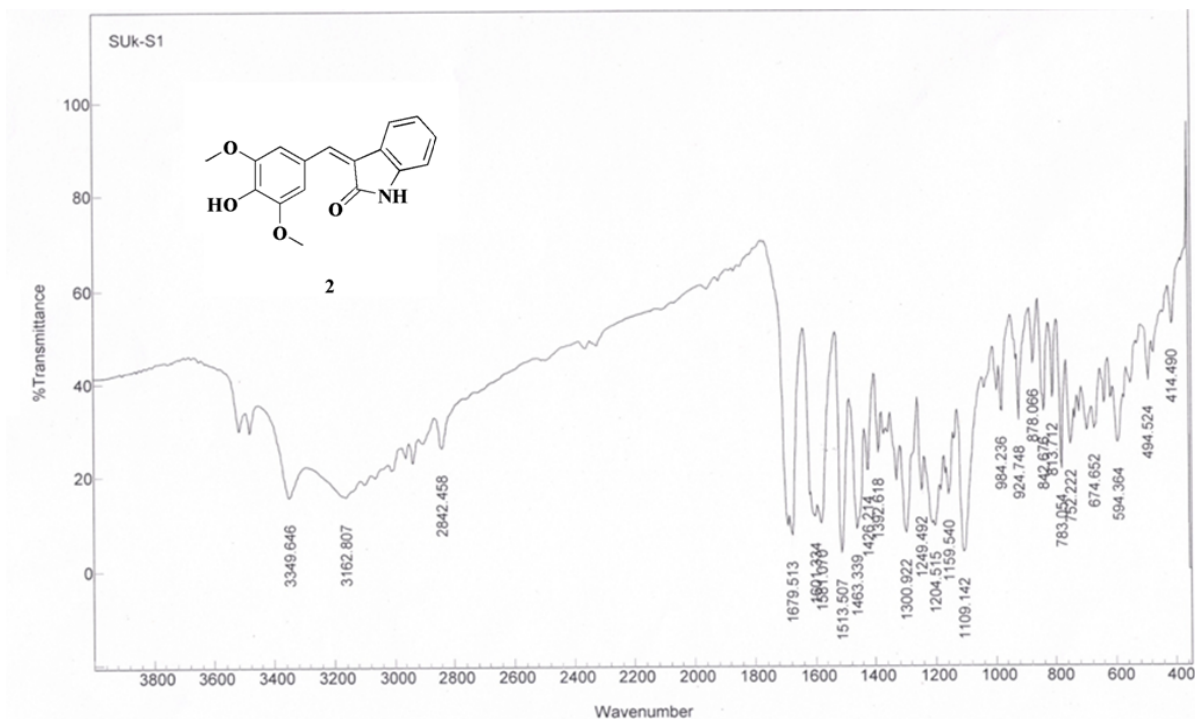

Figure S8. IR spectrum of compound **2**.



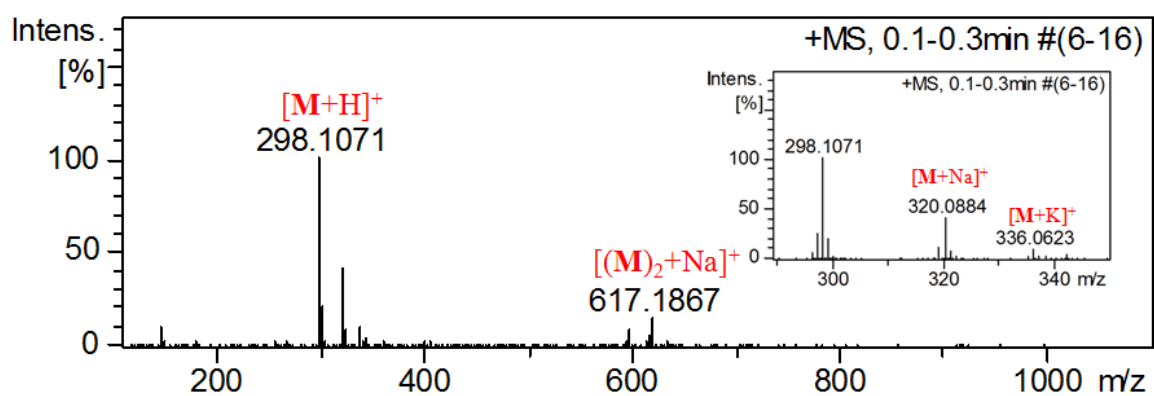

**Figure S9.** High resolution mass spectrum of compound **2** with  $m/z$  298.1071 (calcd  $m/z$  298.1074,  $[M+H]^+$ ).

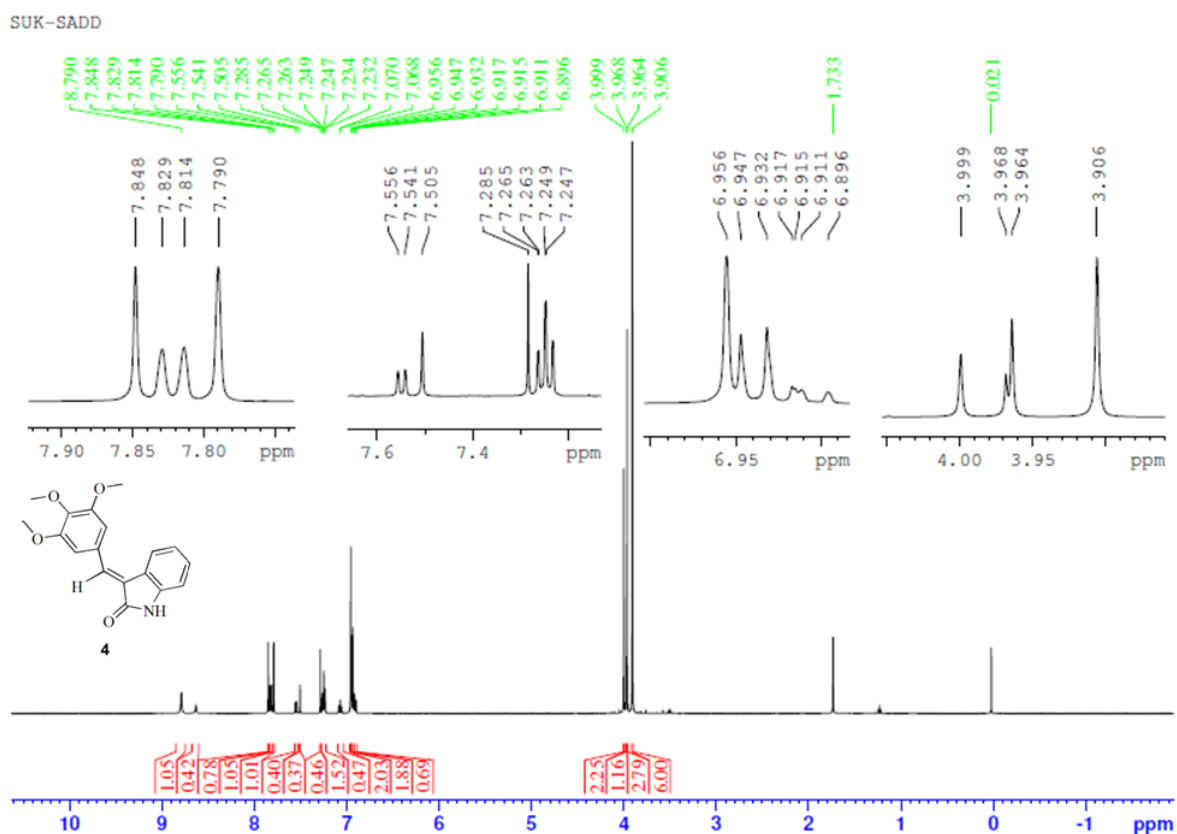

**Figure S10a.**  $^1\text{H}$  NMR spectrum of compound **4**.

==== Shimadzu LCsolution Analysis Report ====

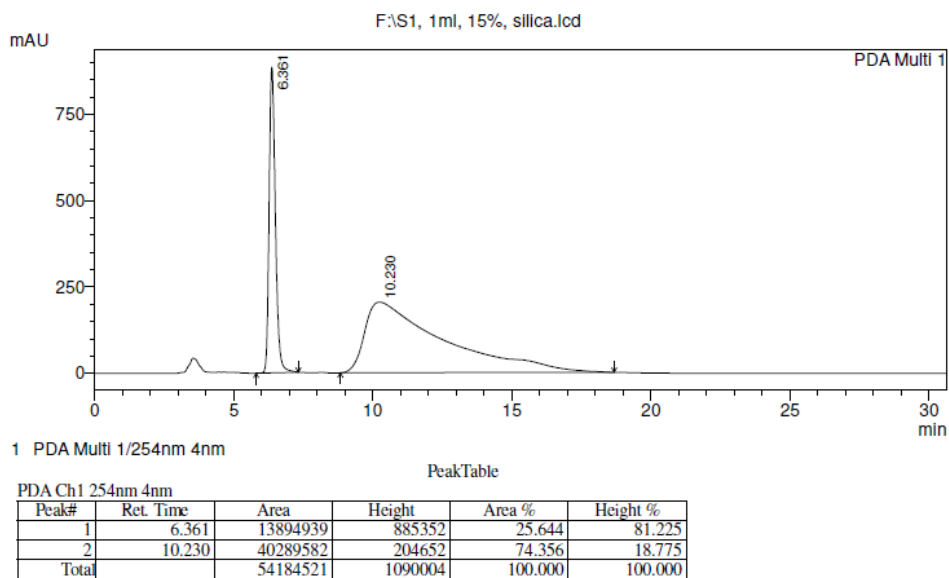

Figure S10b. HPLC chromatogram of compound 4 in 15% IPA and 85% hexane.

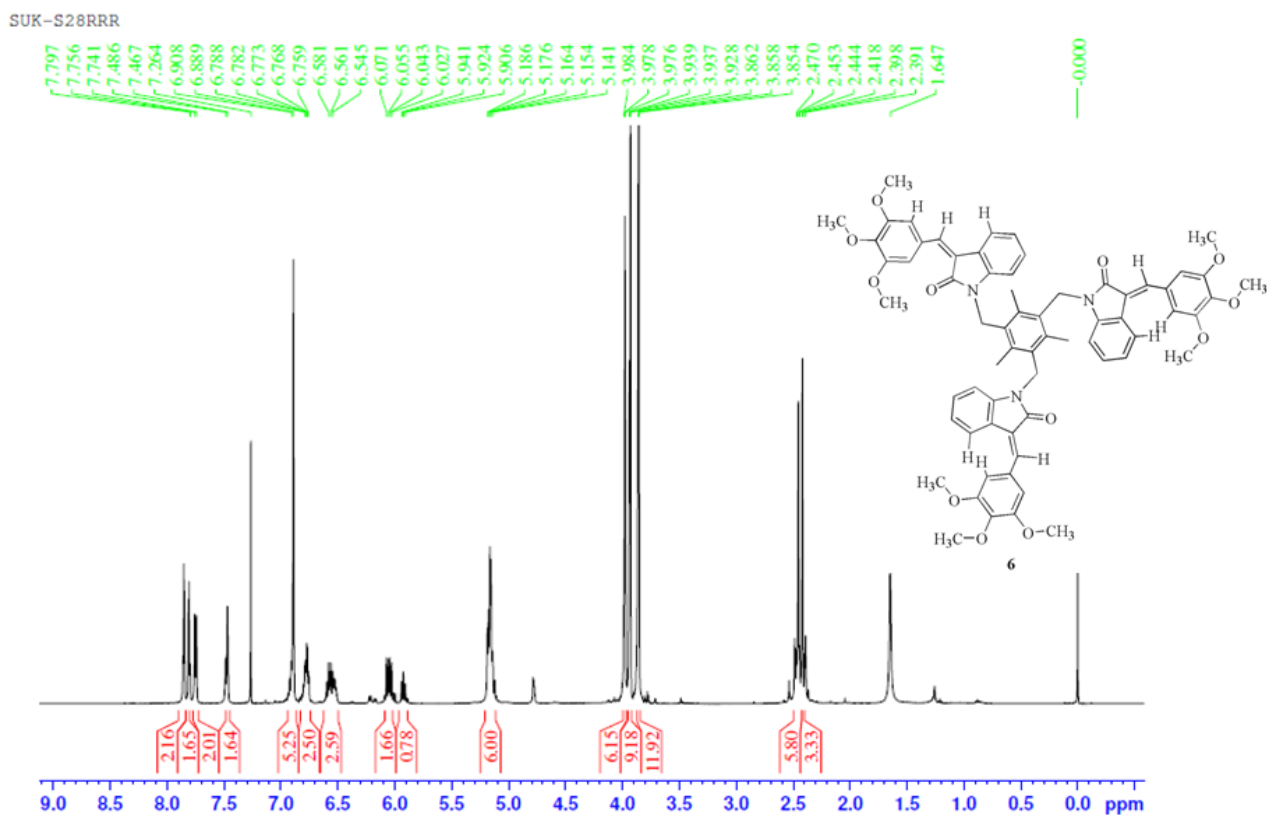

Figure S11. <sup>1</sup>H NMR spectrum of compound 6.

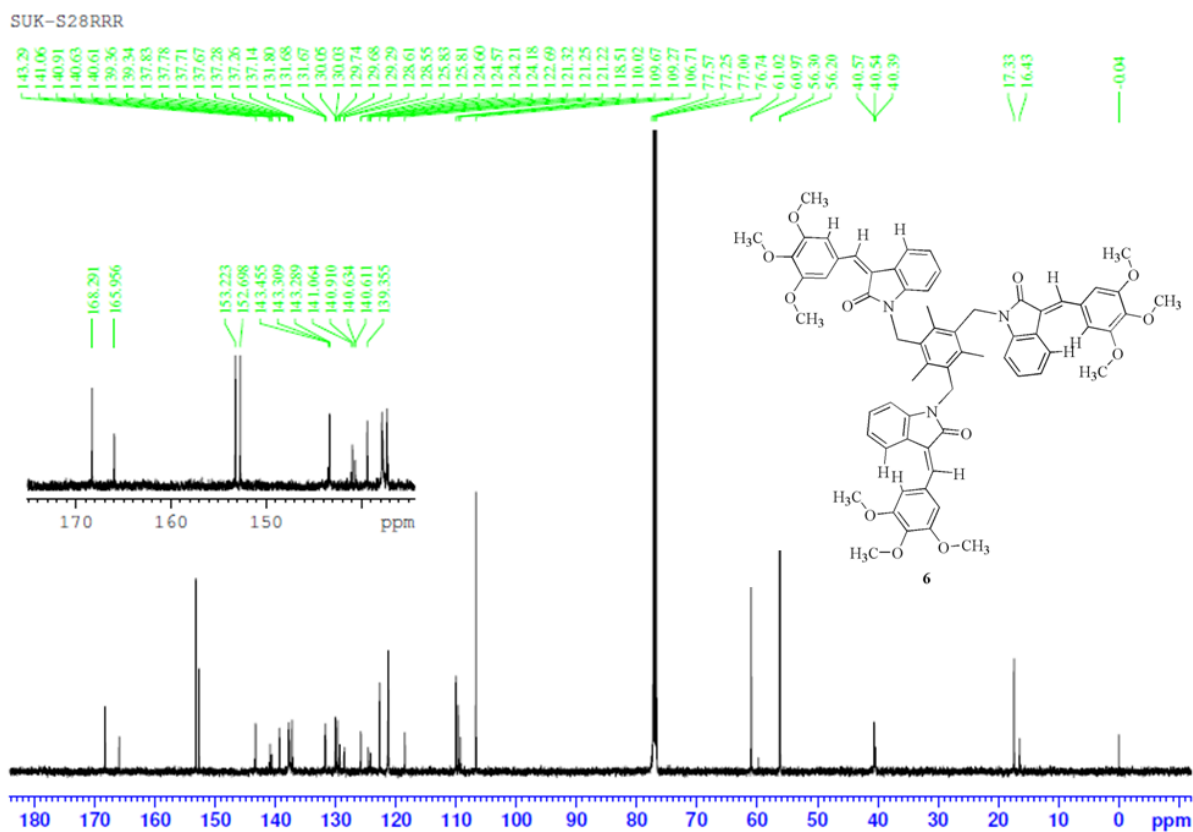

Figure S12.  $^{13}\text{C}$  NMR spectrum of compound 6.

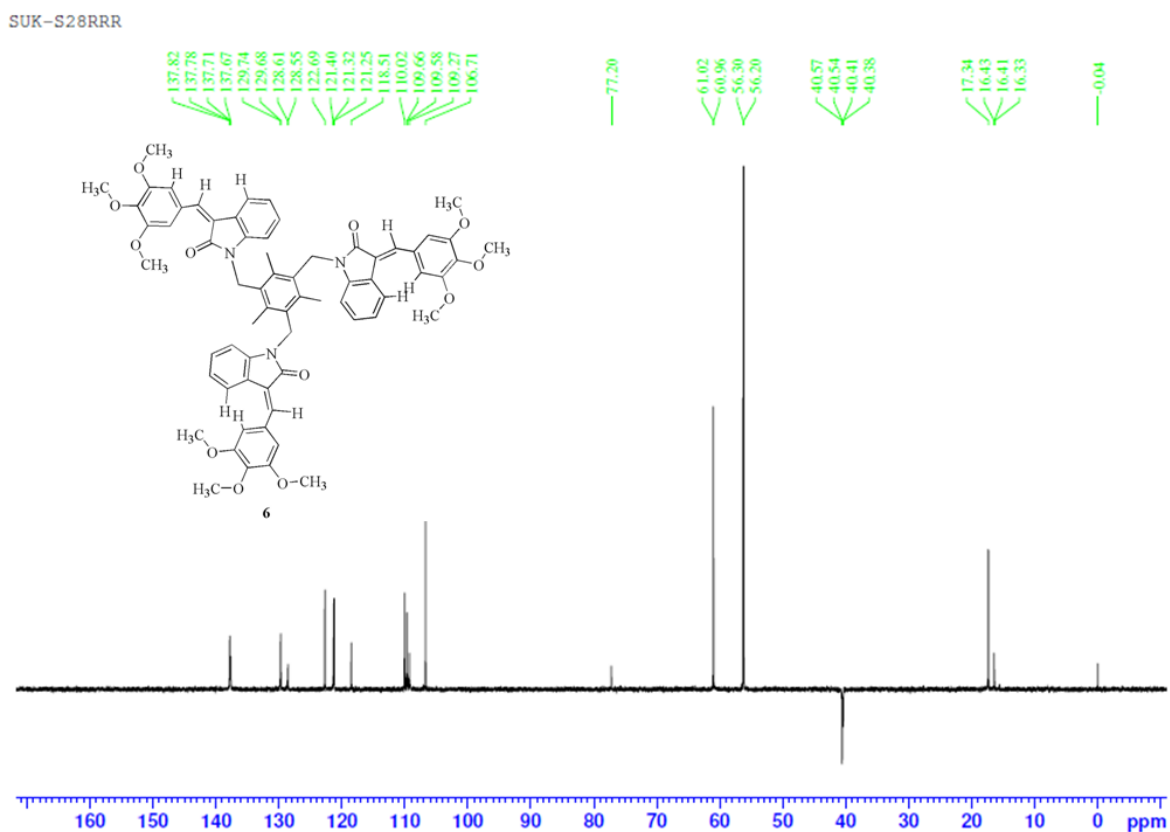

Figure S13. DEPT-135 NMR spectrum of compound 6.

==== Shimadzu LCsolution Analysis Report ====

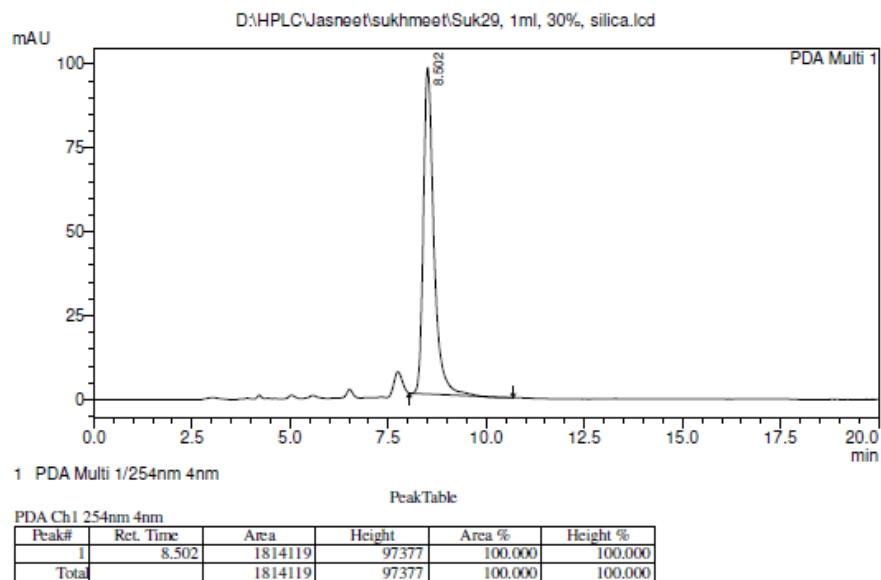

Figure S14a. HPLC chromatogram of compound **3** in 30% IPA and 70% hexane.

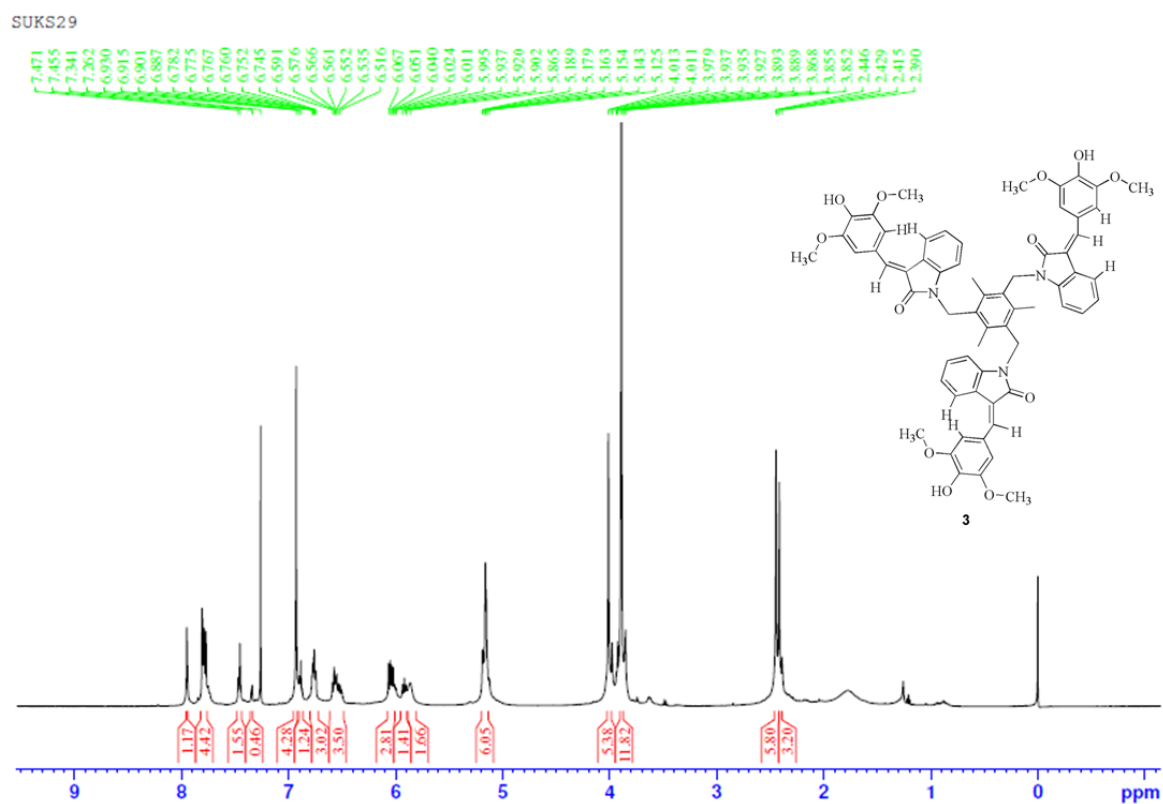

Figure S14b. <sup>1</sup>H NMR spectrum of compound **3** (CDCl<sub>3</sub> as solvent)

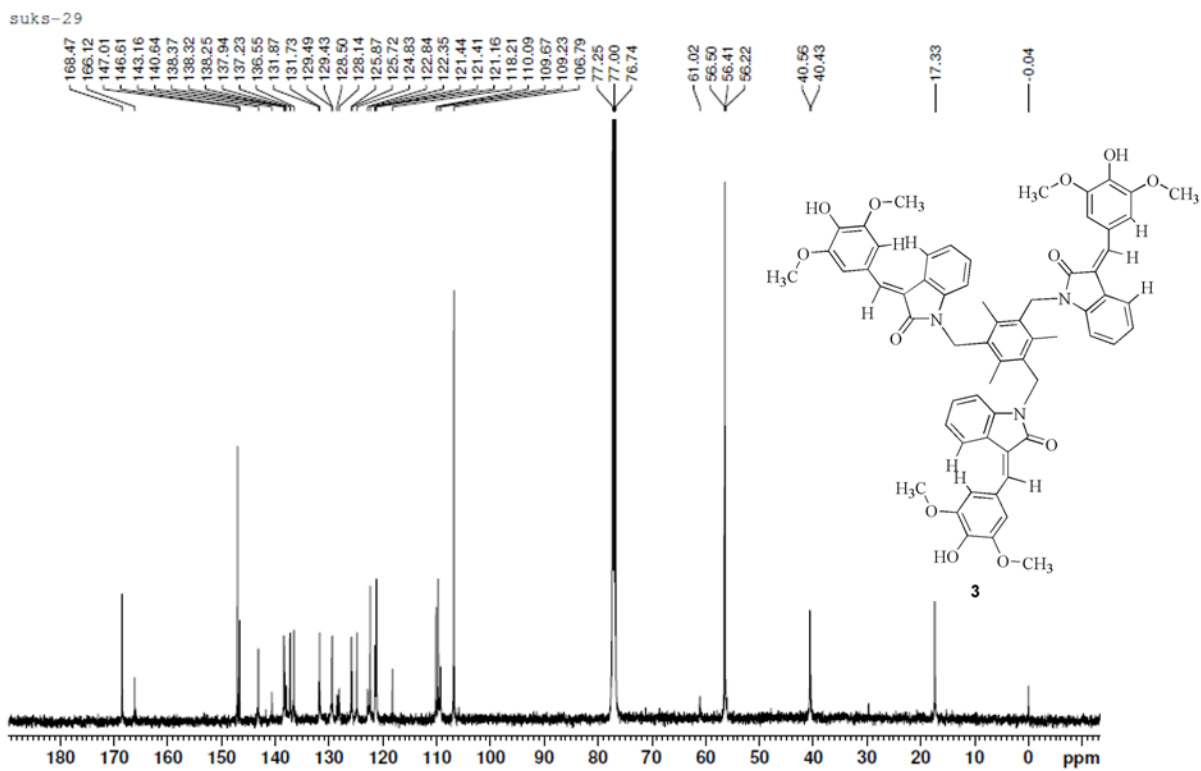

Figure S14c.  $^{13}\text{C}$  NMR spectrum of compound **3** ( $\text{CDCl}_3$  as solvent)

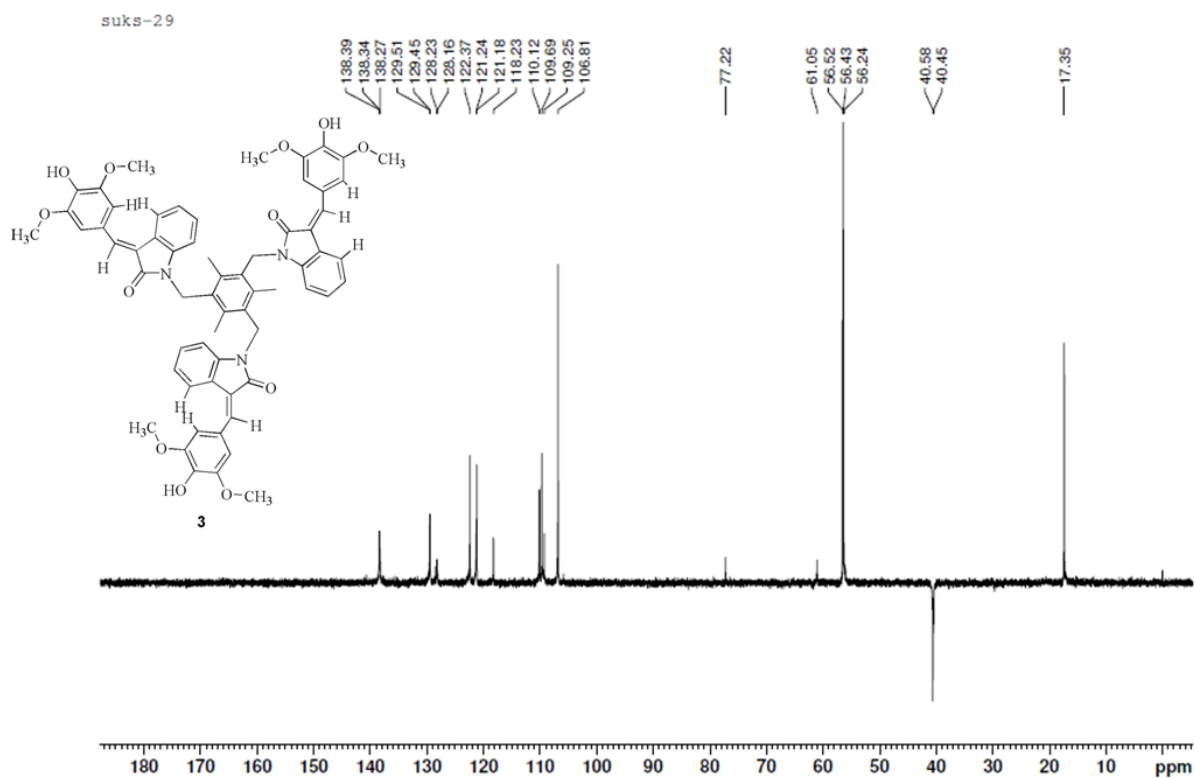

Figure S14d. DEPT-135 NMR spectrum of compound **3** ( $\text{CDCl}_3$  as solvent)

suk-s29-p

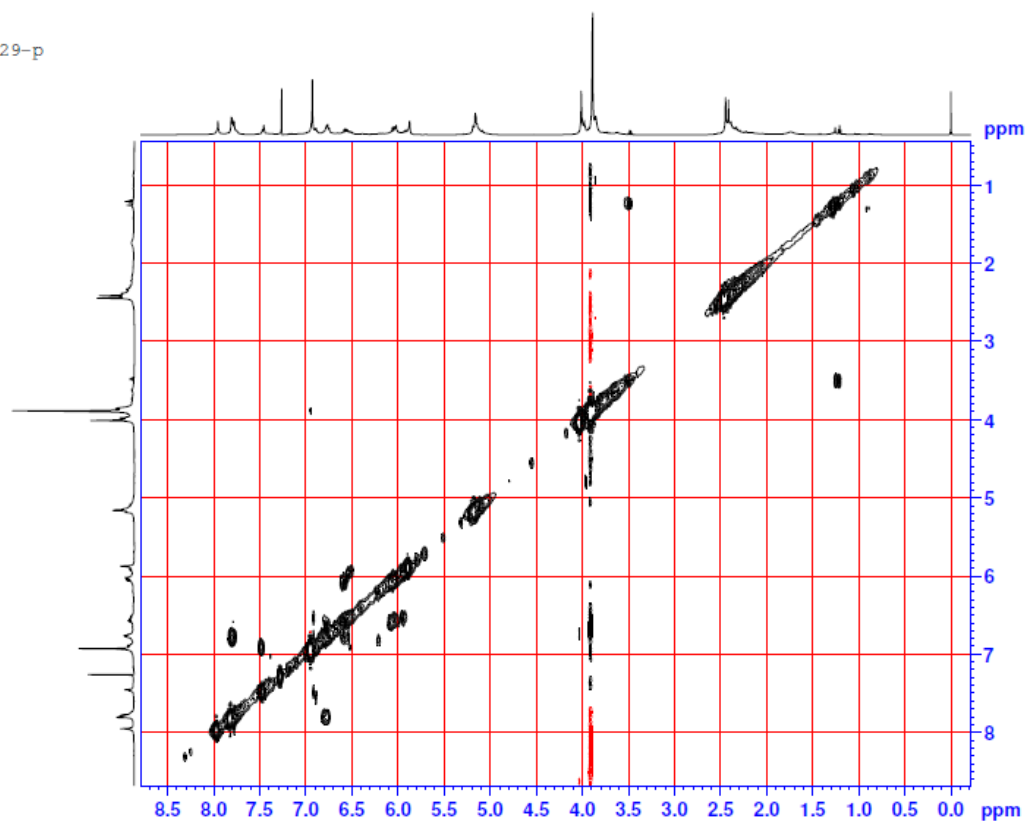

**Figure S14e.** <sup>1</sup>H-<sup>1</sup>H COSY NMR spectrum of compound **3** (CDCl<sub>3</sub> as solvent).

suk-s29-p

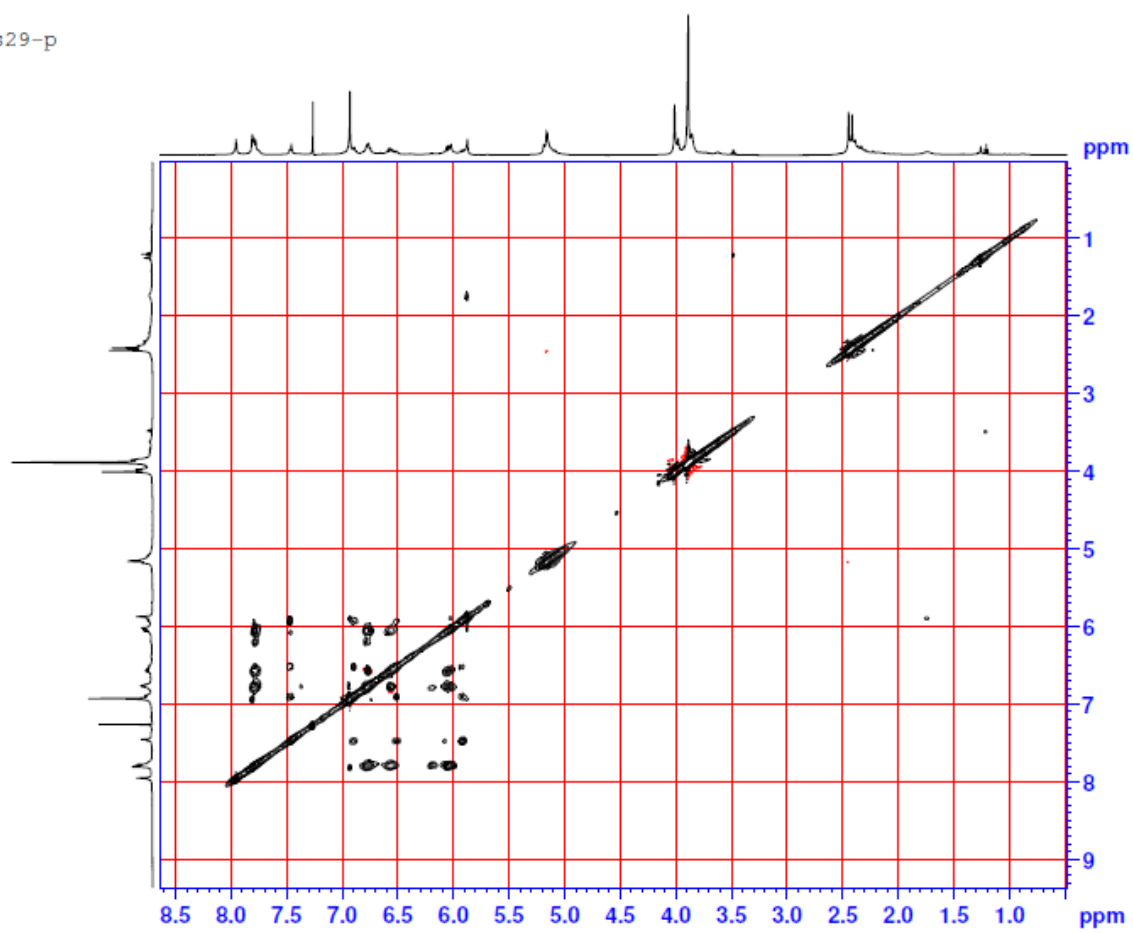

**Figure S14f.**  $^1\text{H}$ - $^1\text{H}$  TOCSY NMR spectrum of compound **3** ( $\text{CDCl}_3$  as solvent).

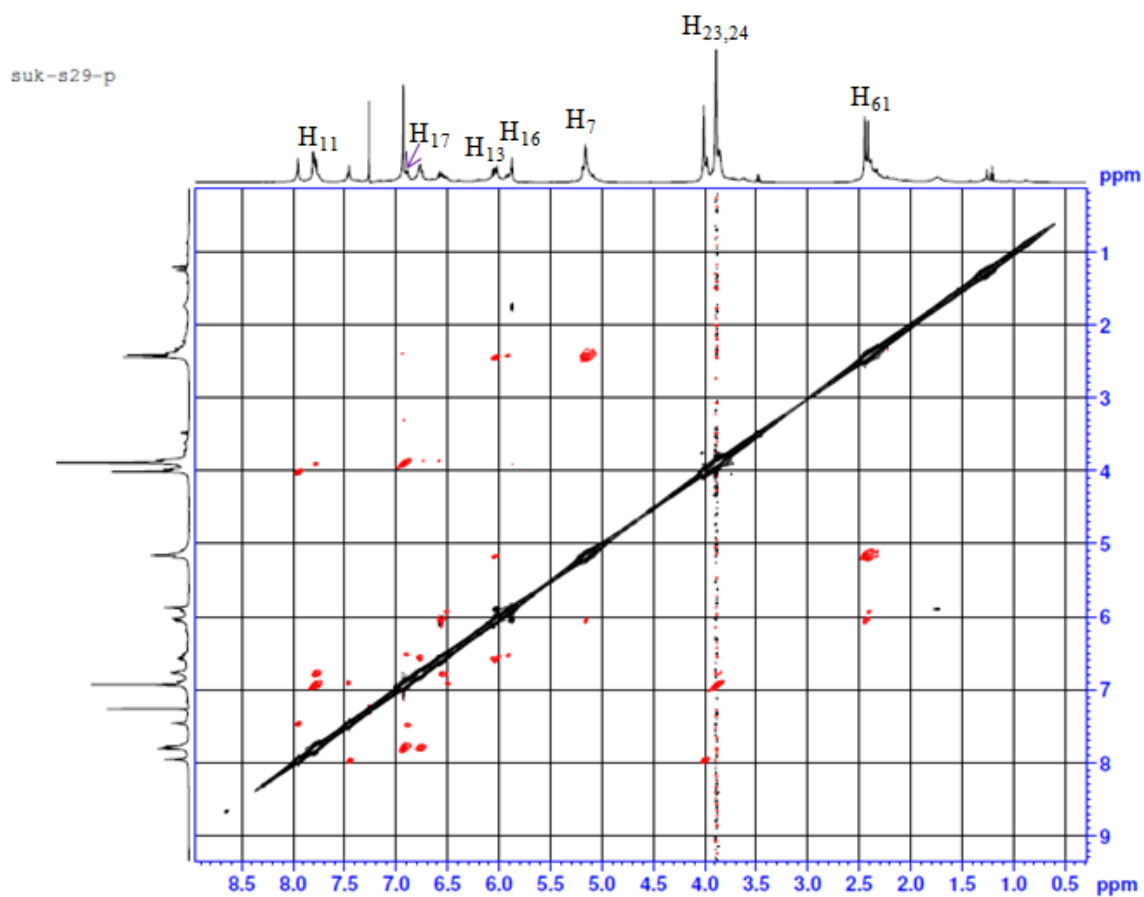

**Figure S14g.**  $^1\text{H}$ - $^1\text{H}$  ROESY NMR spectrum of compound **3** ( $\text{CDCl}_3$  as solvent). For clarity reasons, peaks are partially labelled.



suks-29

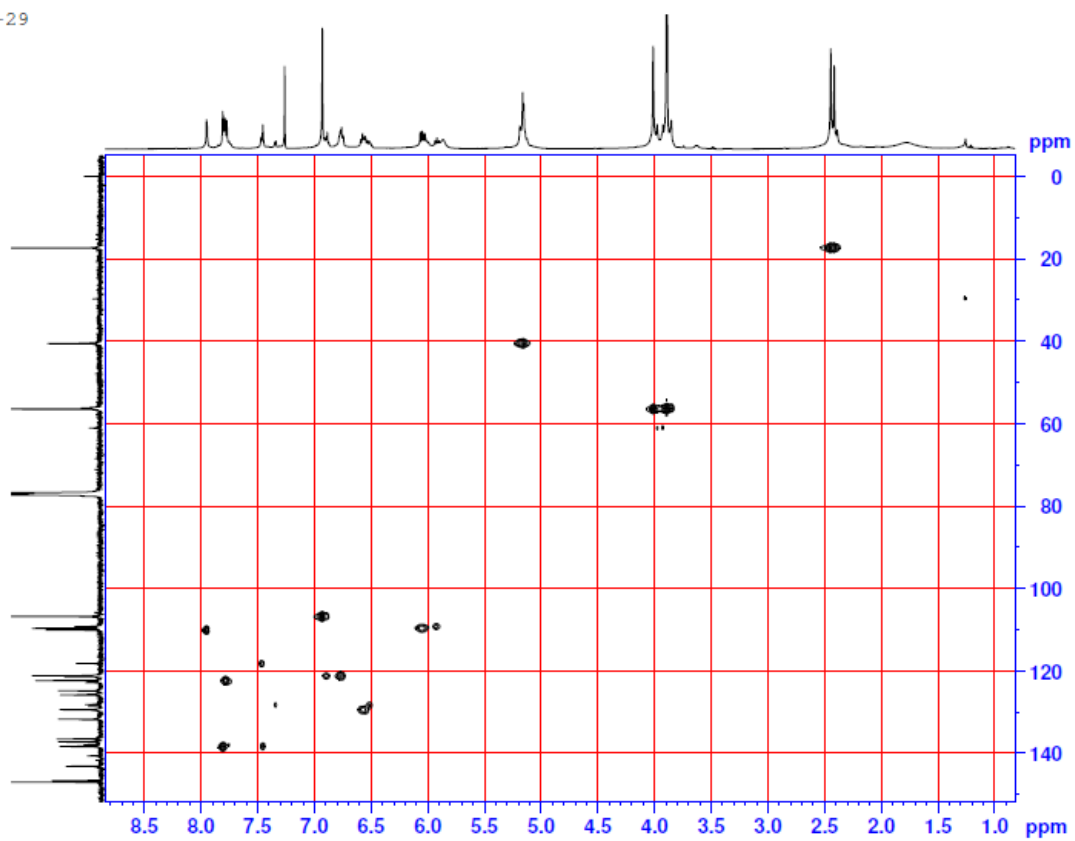

**Figure S14h.**  $^1\text{H}$ - $^{13}\text{C}$  HSQC NMR spectrum of compound **3** ( $\text{CDCl}_3$  as solvent).

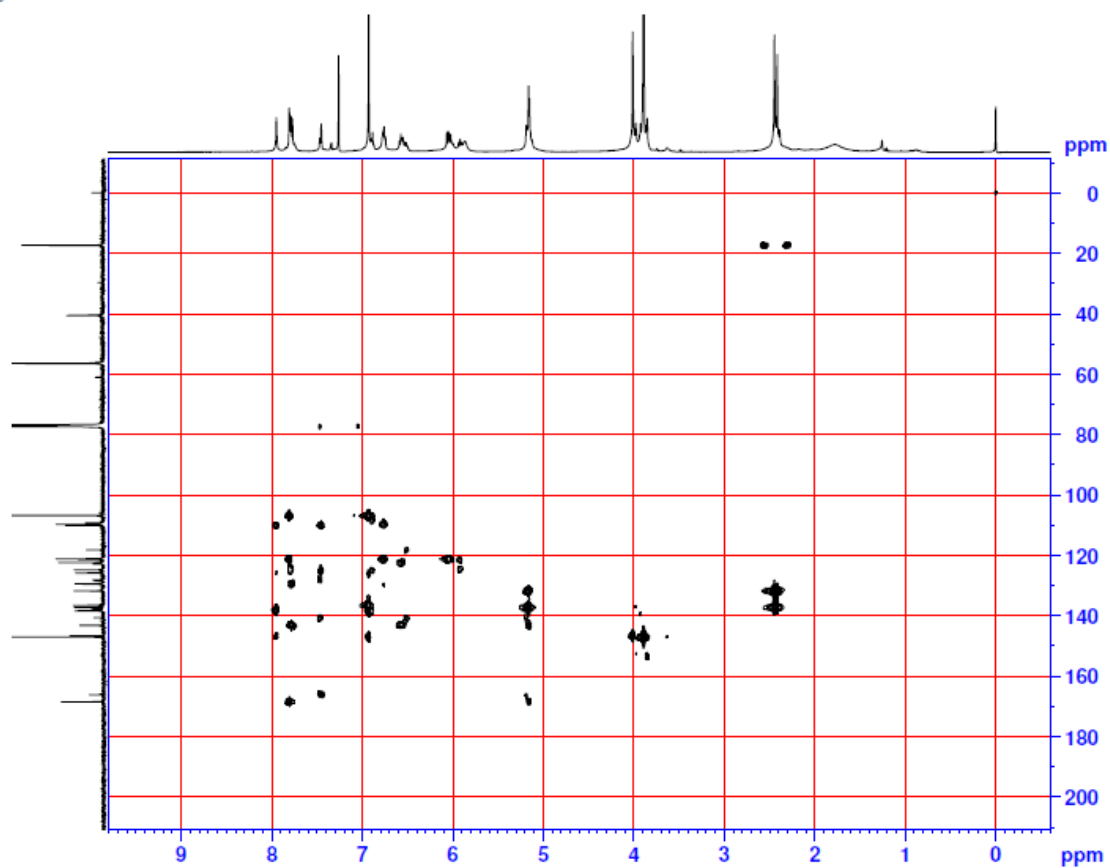

**Figure S14i.** <sup>1</sup>H-<sup>13</sup>C HMBC NMR spectrum of compound **3** (CDCl<sub>3</sub> as solvent).

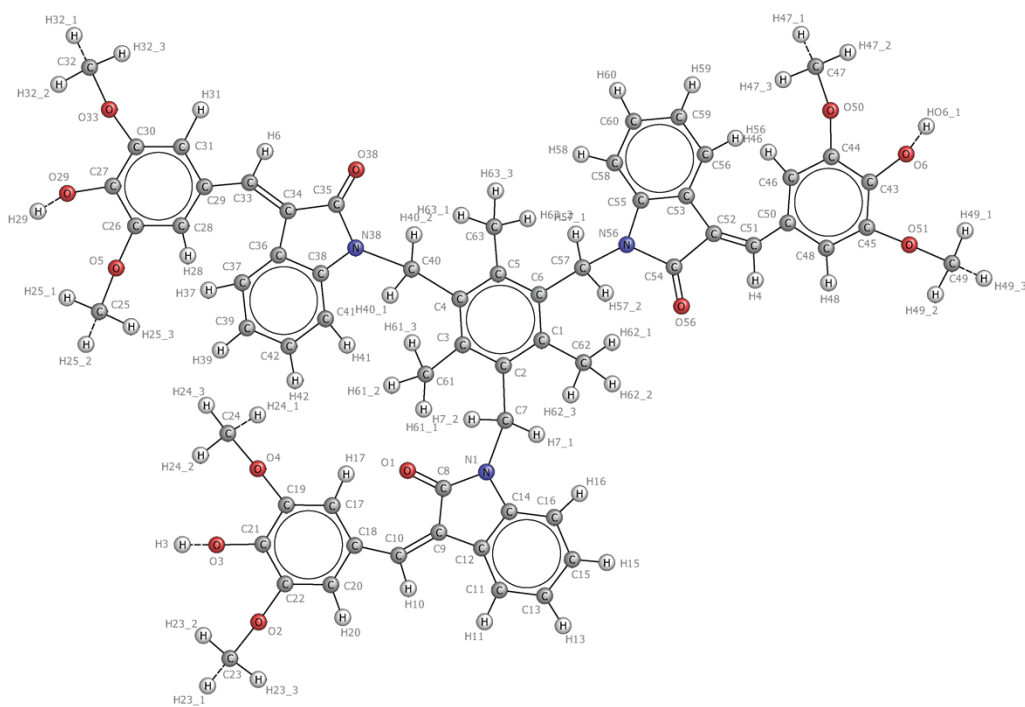

**Figure S14j.** Structure of compound **3** obtained with the help of different NMR experiments.



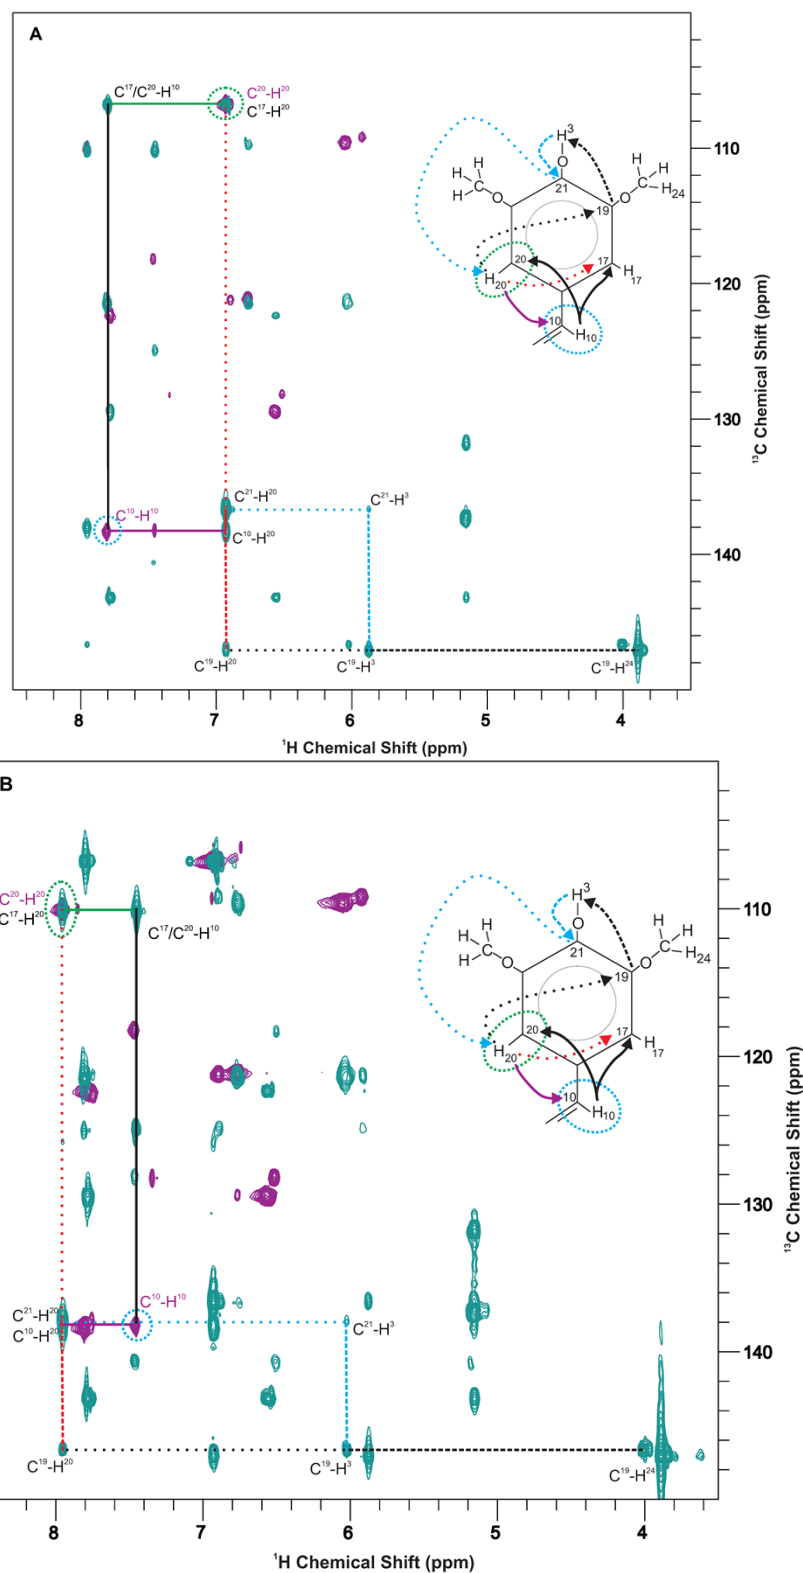

**Figure S14I.** Overlay of HSQC (Magenta coloured cross-peaks) and HMBC (Cyan coloured cross-peaks) spectra. HMBC correlations between are shown using different types of straight lines as follows; C<sup>19</sup>-H<sup>3</sup> (dash, black); C<sup>19</sup>-H<sup>20</sup> (dot, black); C<sup>10</sup>-H<sup>20</sup> (dash, orange); C<sup>21</sup>-H<sup>20</sup> (solid, orange); C<sup>17</sup>-H<sup>20</sup> (dot, orange); C<sup>17</sup>/C<sup>20</sup>-H<sup>20</sup> (solid, green); C<sup>10</sup>-H<sup>10</sup> (solid, black); C<sup>21</sup>-H<sup>3</sup> (dash, sky blue); C<sup>21</sup>-H<sup>20</sup> (dot, sky blue). HSQC correlations are highlighted using dotted circles; C<sup>10</sup>-H<sup>10</sup> (sky blue); C<sup>20</sup>-H<sup>20</sup> (green). These correlations are also show on stick model of molecule (shown in inset) using the same line styles and colour schemes. Figure A and B show respectively the correlations for the A/B and C fragments of compound 3 (Scheme 1, main text).

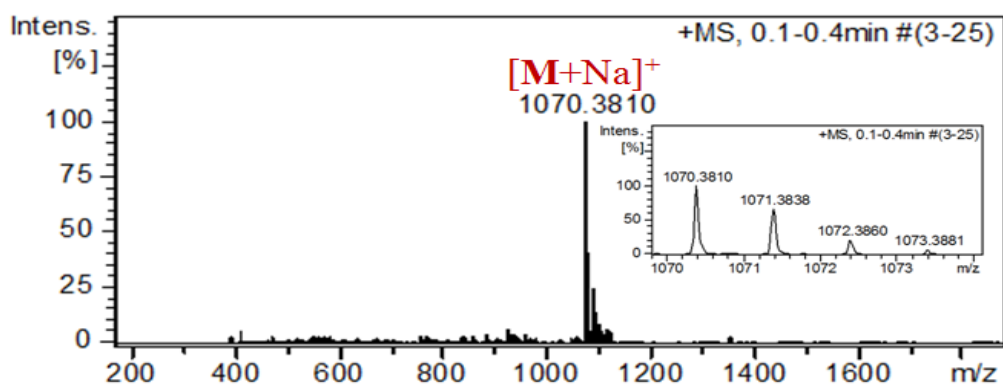

**Figure S14m.** High resolution mass spectrum of compound **3** in positive ESI mode (calcd  $m/z$  1070.3798,  $[M+Na]^+$ ).

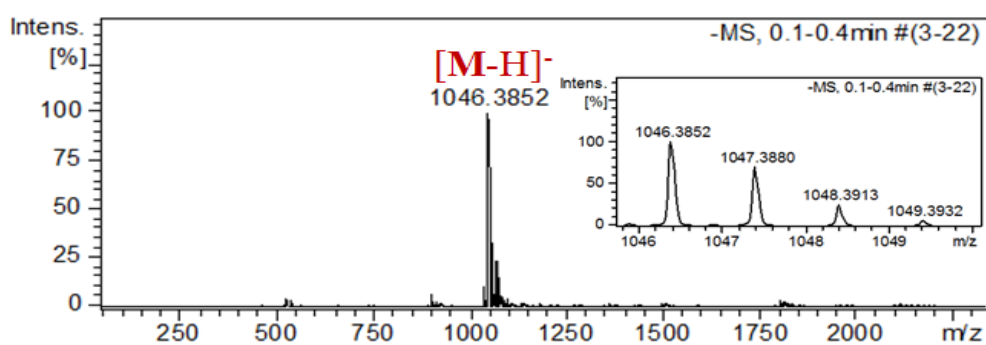

**Figure S14n.** High resolution mass spectrum of compound **3** in negative ESI mode (calcd  $m/z$  1046.3856,  $[M-H]^-$ ).

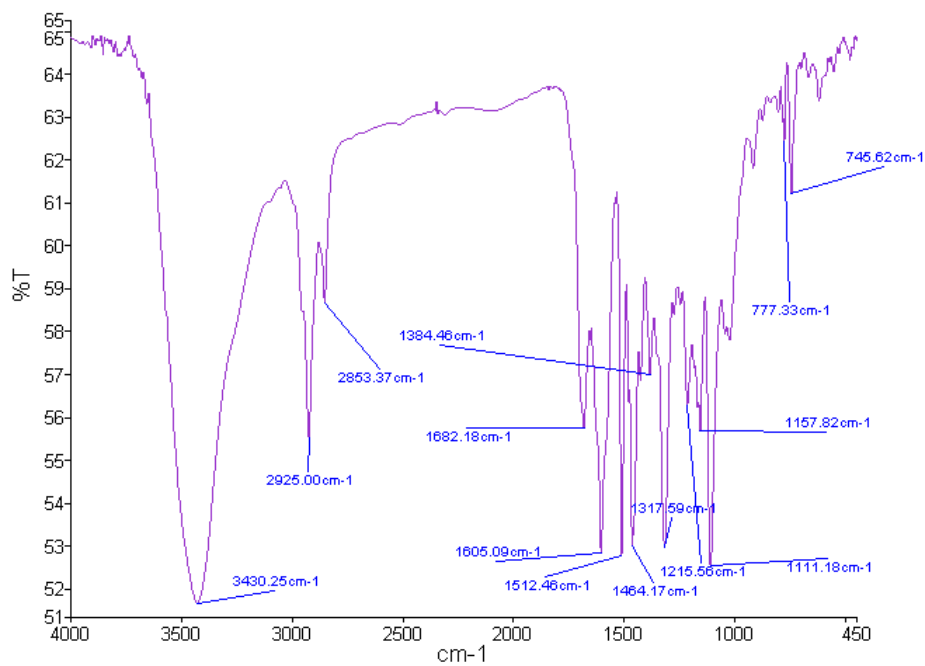

**Figure S14o.** IR spectrum of compound **3**.

**Table S1.** Composition of tap water and ultrapure water used in the present studies.

| Physical parameter | Water sample – I (ultrapure de-ionized)* | Water sample – II (tap water) |
|--------------------|------------------------------------------|-------------------------------|
| pH                 | 7.1±0.1                                  | 7.2±0.1                       |
| TDS (mg/L)         | <0.1                                     | 400±10                        |
| TSS (mg/L)         | NIL                                      | NIL                           |
| Cond. (µs)         | 2.9±0.1                                  | 240                           |
| Hardness (mg/L)    | 15±1                                     | 270                           |
| Calcium (mg/L)     | NIL                                      | 60±5                          |
| Magnesium (mg/L)   | NIL                                      | 30±5                          |
| Iron (mg/L)        | NIL                                      | 0.02±0.01                     |
| Chlorides (mg/L)   | NIL                                      | 14±2                          |

\*purchased from Sigma-Aldrich

**Table S2.** Addition of various salts to solution of compound **3** in ultrapure water.

| Salt (1 mM)                        | Color change with |         |
|------------------------------------|-------------------|---------|
|                                    | Compd 3           | Compd 4 |
| Ca(HCO <sub>3</sub> ) <sub>2</sub> | No                | No      |
| Mg(HCO <sub>3</sub> ) <sub>2</sub> | No                | No      |
| CaCl <sub>2</sub>                  | No                | No      |
| MgCl <sub>2</sub>                  | No                | No      |
| NaCN                               | orange            | orange  |

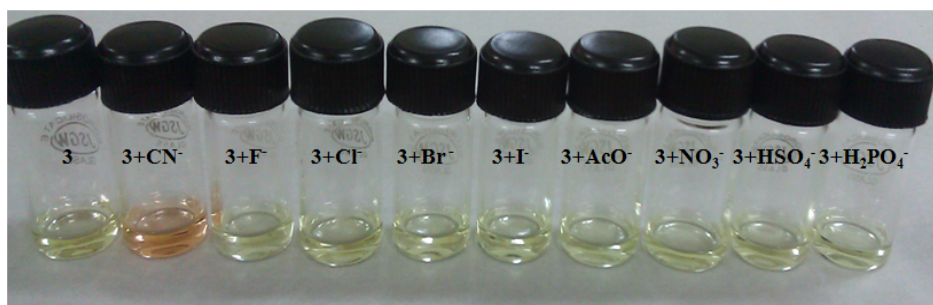

**Figure S15.** Colour change of compound **3** (1  $\mu\text{M}$ , DMSO-water, 1:1 v/v) in presence of anions:  $\text{CN}^-$ ,  $\text{F}^-$ ,  $\text{Cl}^-$ ,  $\text{Br}^-$ ,  $\text{I}^-$ ,  $\text{AcO}^-$ ,  $\text{NO}_3^-$ ,  $\text{HSO}_4^-$ ,  $\text{H}_2\text{PO}_4^-$ .

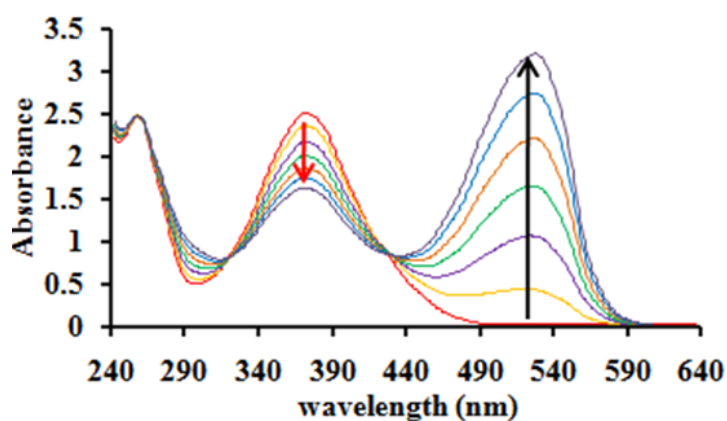

**Figure S16.** UV-Vis spectral change in 1  $\mu\text{M}$  solution of compound **3** in  $\text{CHCl}_3$  using TBACN as source of  $\text{CN}^-$ .

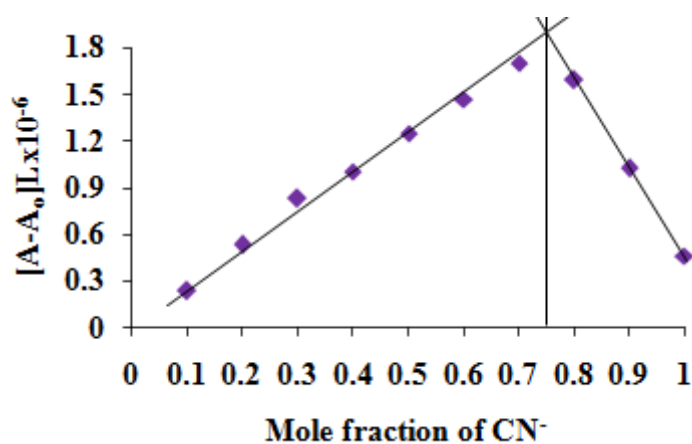

**Figure S17.** Job's plot for compound **3** with  $\text{CN}^-$  in DMSO-water (1:1, v/v), monitored at 501 nm.

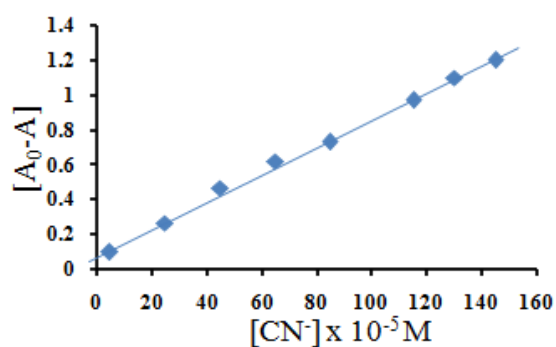

**Figure S18.** Linear plot of change in absorbance at 387 nm Vs [CN<sup>-</sup>] for determination of detection limit of CN<sup>-</sup> by compound **3**.

**Calculations:** Detection limit is obtained by using following formula:

$$DL \text{ (detection limit)} = (3 \times S. D.) / \text{Slope}$$

where S. D. (Standard Deviation) = 0.00025

Slope = 0.00779

Ref: Goswami, S.; Das, S.; Aich, K.; Sarkar, D.; Kumar, T.M.; Quahc, C. K.; Func, H.K. CHEF induced highly selective and sensitive turn-on fluorogenic and colorimetric sensor for Fe<sup>3+</sup>. *Dalton Trans.* **2013**, 42, 15113-15119.



SUK-S29  
1H D2O

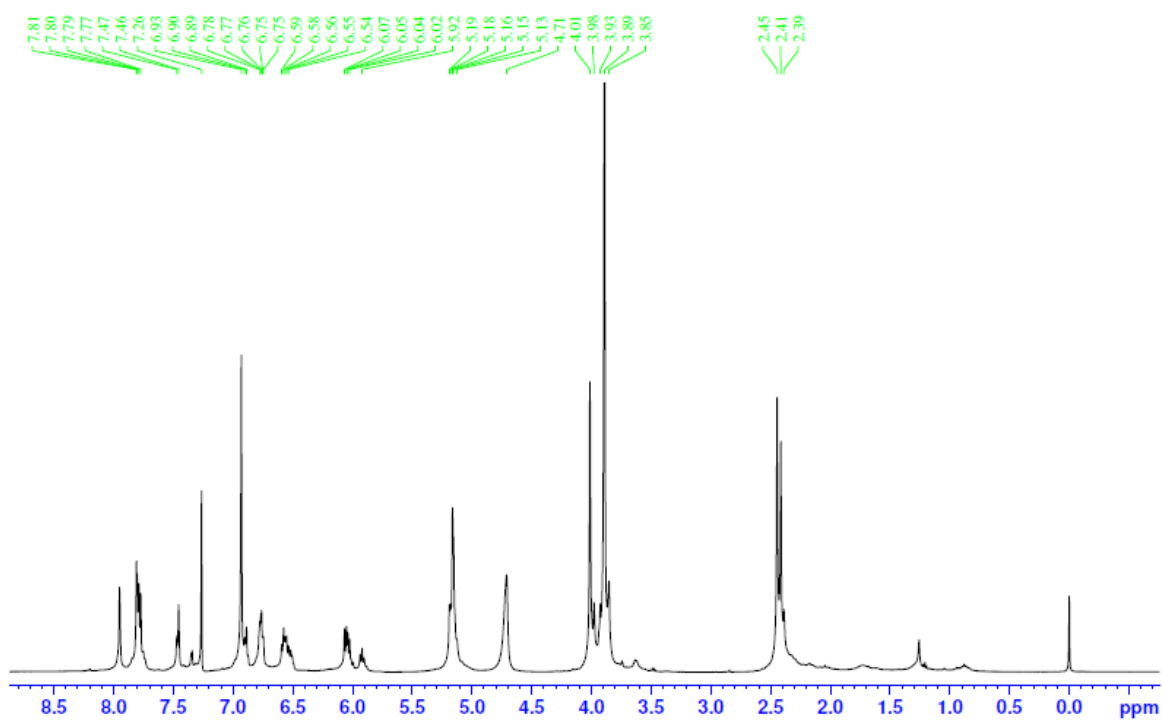

**Figure 19a.** D<sub>2</sub>O exchange <sup>1</sup>H NMR spectrum of compound 3

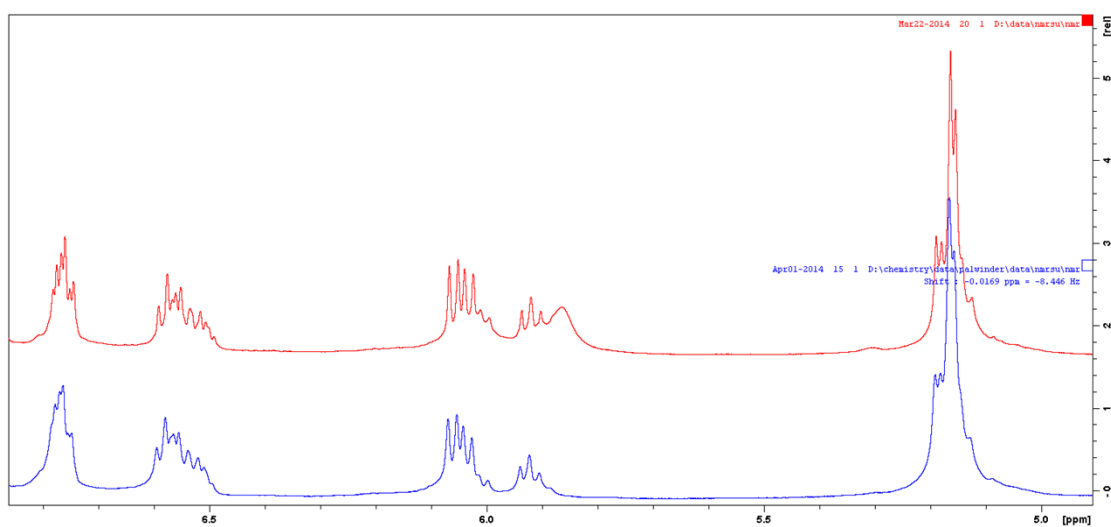

**Figure S19b.** Comparison of <sup>1</sup>H NMR spectra of compound 3 without D<sub>2</sub>O (red trace) and with D<sub>2</sub>O (blue trace).

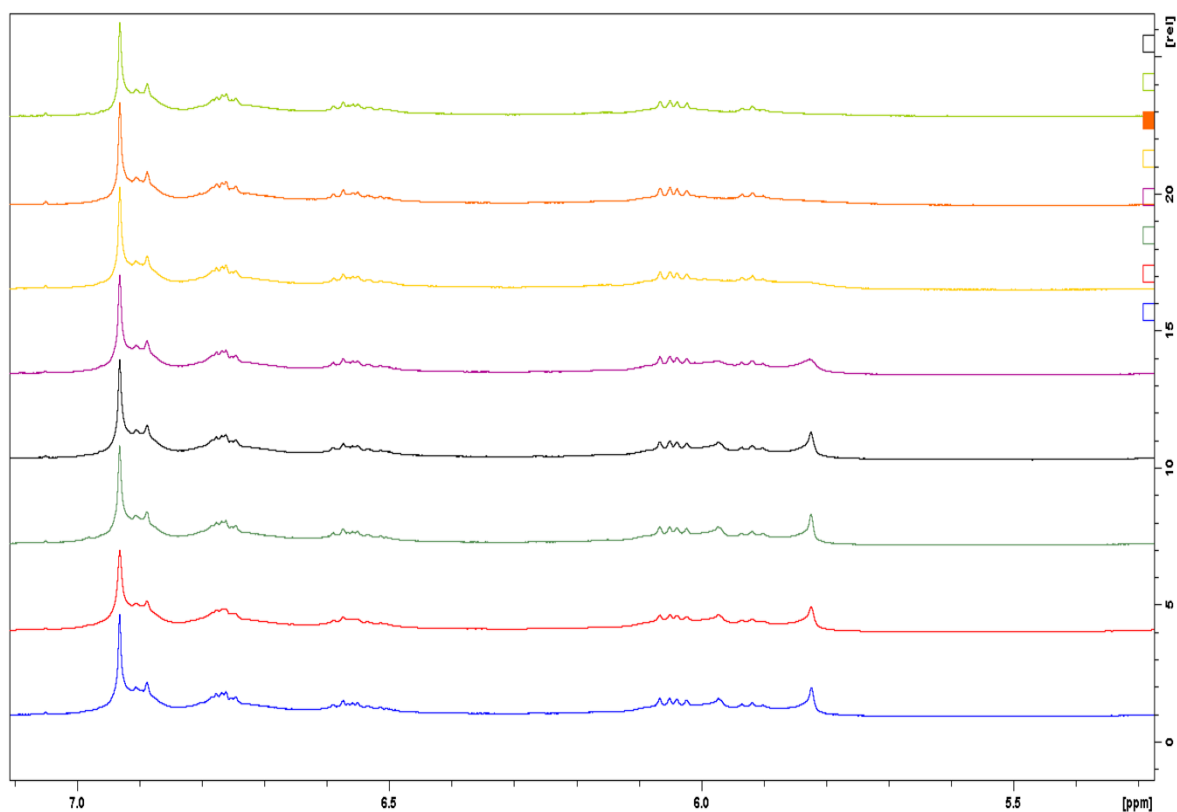

**Figure S20a.** Parts of the  $^1\text{H}$  NMR spectrum of compound **3**. From bottom to upward : (a) pure compound; (b) with 0.001 eq.  $\text{CN}^-$ ; (c) 0.003 eq.  $\text{CN}^-$ ; (d) 0.005 eq.  $\text{CN}^-$ ; (e) 0.01 eq.  $\text{CN}^-$ ; (f) 0.02 eq.  $\text{CN}^-$ ; (g) 0.04 eq.  $\text{CN}^-$ ; (h) 0.06 eq.  $\text{CN}^-$ .

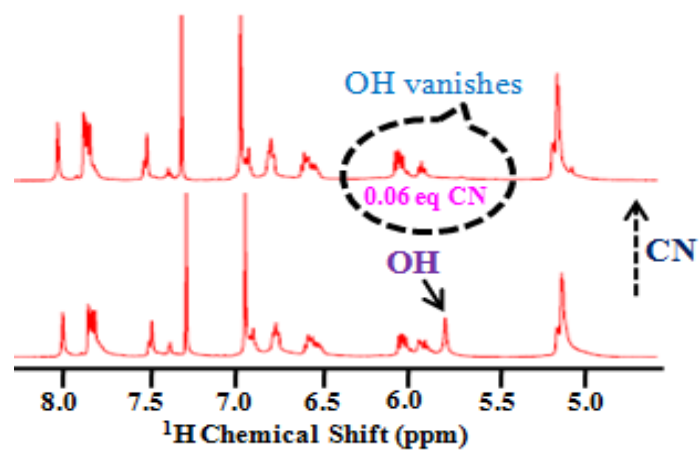

**Figure 20b.** Parts of  $^1\text{H}$  NMR spectra of compound **3**: pure compound (lower trace) and in presence of  $\text{CN}^-$  (upper trace).

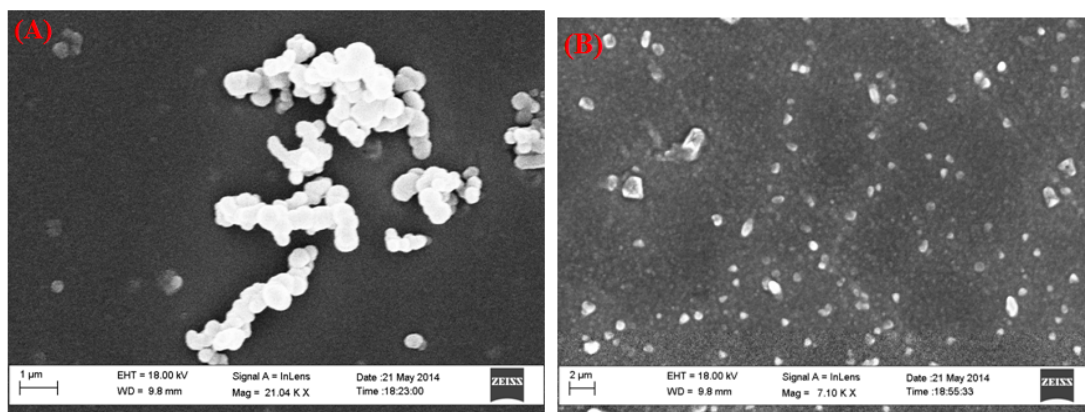

**Figure S21.** SEM images (A) Compound 3: (B) Compound 7.

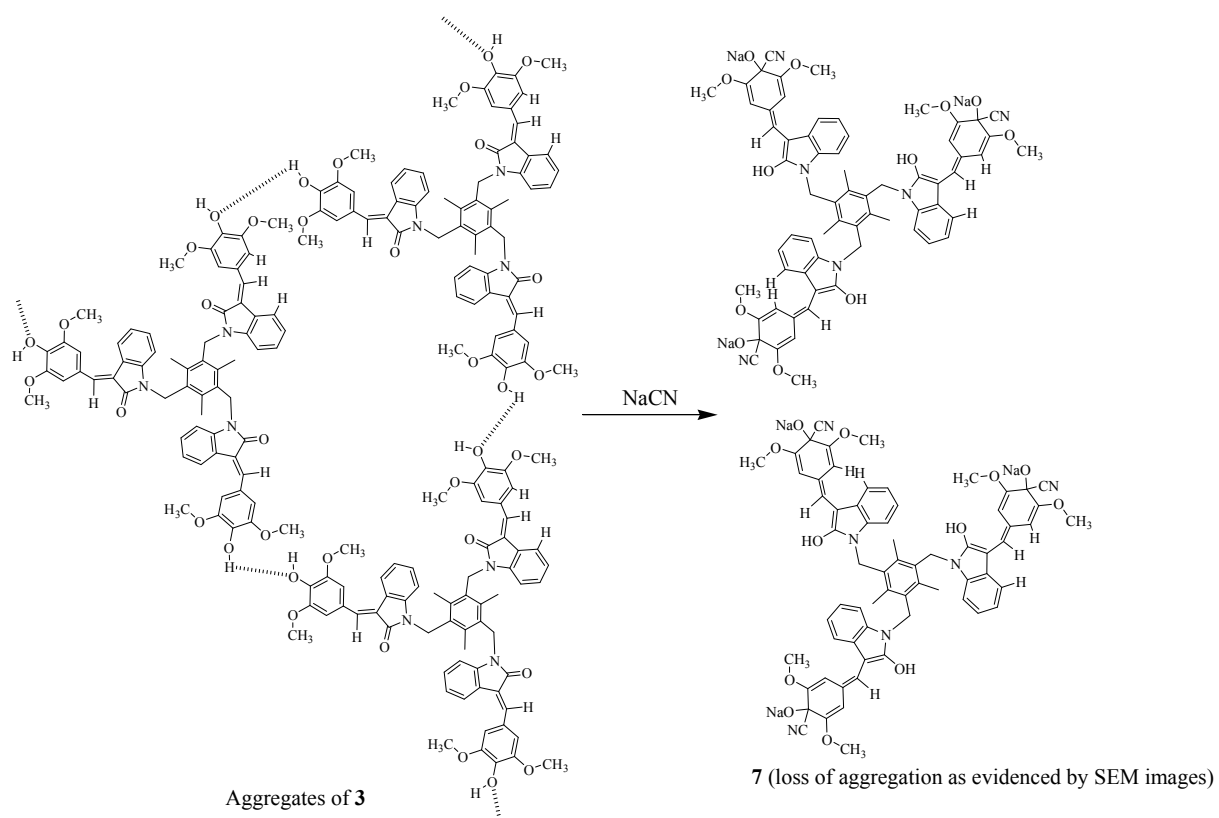

**Scheme S1**

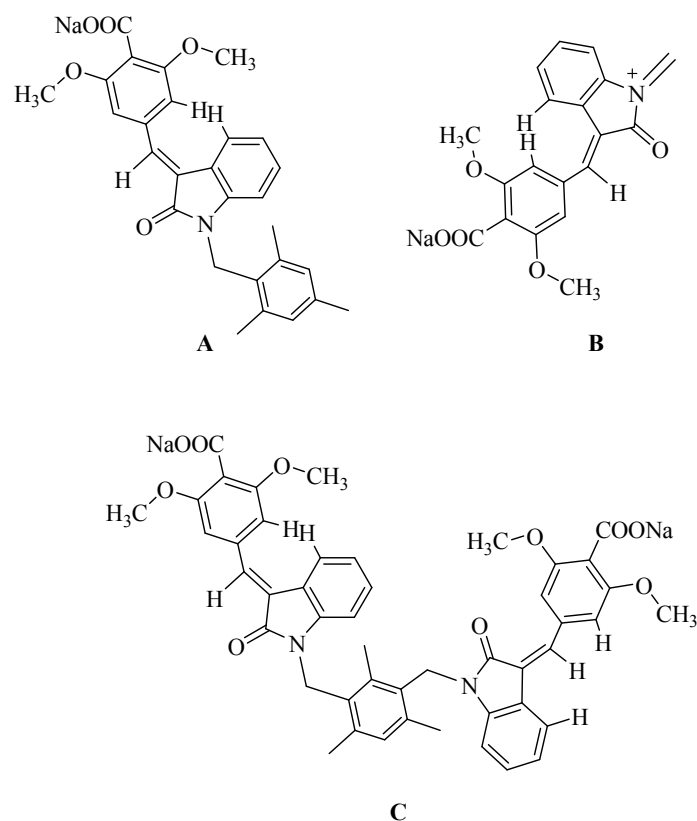

**Chart S1**

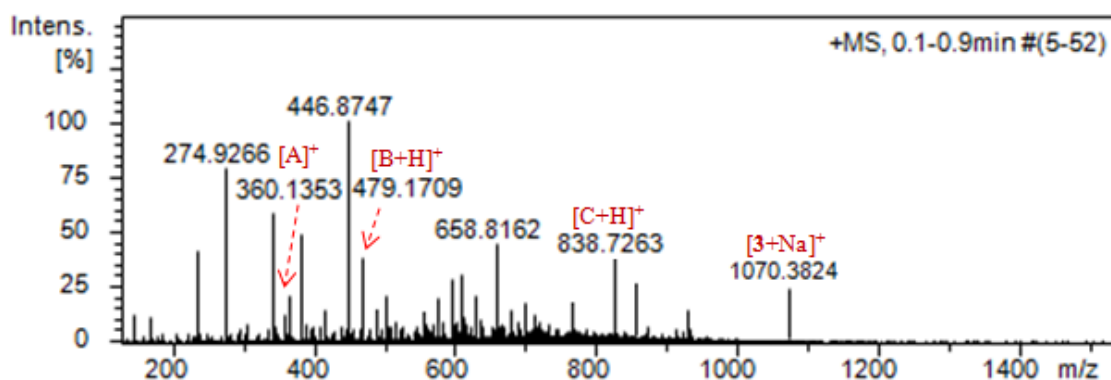

**Figure S22.** Mass spectrum showing breakdown of compound 7/8 to smaller components. For various species, refer Chart S1. Amongst these, fragment B (chart S1) is an analogue of trimethoprim (anti-bacterial drug) and possibly be metabolized safely. With the loss of water from the phenolic carbon, aromatization was also observed.

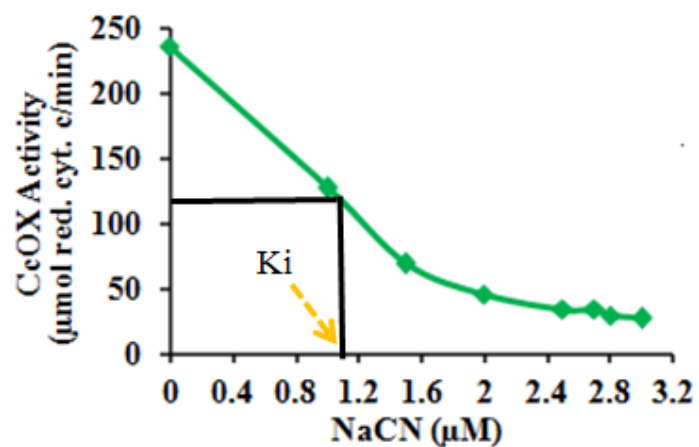

**Figure S23.** Inhibition constant ( $K_i$ ) of cyanide for Cyt c oxidase.

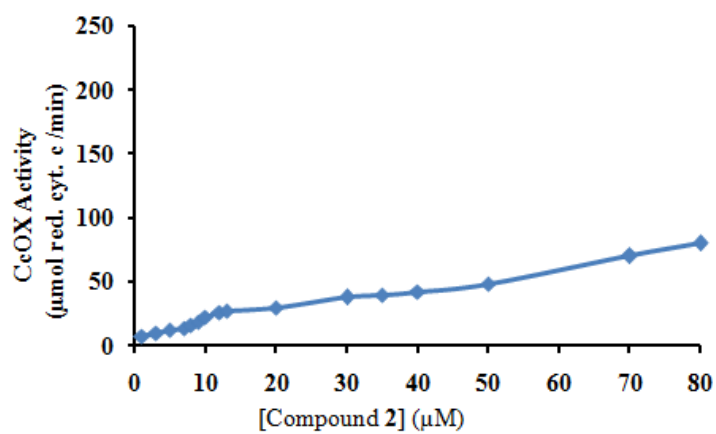

**Figure S24.** Recovery of cyanide bound CcOX activity in the presence of compound 2.
